# Supplementary material for: Exosomal MicroRNAs in Pregnancy Provides Insight into a Possible Cure for Cancer
Source: PubMed Central journal article supplement (PMC7432616; doi:10.3390/ijms21155384), 2020-07-29
Supplement: ijms-21-05384-s001.pdf [file ijms-21-05384-s001.pdf]

**Supplementary Table 1:** Log2 Exosomal miRNA Expression values of exomiRs in pregnant woman (33 ± 1 weeks and 38 ± 1 weeks, n=5) with an arbitrary |fold change| ≥ 1.5.

| miRNA                         | Mean Expression Values (Log2)<br>(33 ± 1 Weeks) | Mean Expression Values (Log2)<br>(38 ± 1 Weeks) |
|-------------------------------|-------------------------------------------------|-------------------------------------------------|
| hsa-miR-451a                  | 11.06 ± 0.07                                    | 9.95 ± 0.09                                     |
| hsa-miR-302d-3p               | 7.54 ± 0.06                                     | 9.24 ± 0.01                                     |
| hsa-miR-223-3p                | 4.95 ± 0.11                                     | 5.5 ± 0.05                                      |
| hsa-miR-520h                  | 2 ± 0.00                                        | 4.4 ± 0.00                                      |
| hsa-miR-122-5p                | 2 ± 0.09                                        | 4.3 ± 0.11                                      |
| hsa-miR-4755-5p               | 2 ± 0.11                                        | 4 ± 0.09                                        |
| hsa-miR-219b-3p               | 2 ± 0.10                                        | 4 ± 0.08                                        |
| hsa-miR-612                   | 1.8 ± 0.08                                      | 3.4 ± 0.01                                      |
| hsa-miR-2116-5p               | 1.7 ± 0.01                                      | 3.2 ± 0.01                                      |
| hsa-miR-548g-3p               | 1.8 ± 0.03                                      | 3.3 ± 0.01                                      |
| hsa-miR-92a-3p                | 1.9 ± 0.00                                      | 3.5 ± 0.04                                      |
| hsa-miR-765                   | 1.8 ± 0.01                                      | 3.2 ± 0.01                                      |
| hsa-miR-573                   | 1.6 ± 0.08                                      | 2.78 ± 0.04                                     |
| hsa-miR-371a-5p               | 1.3 ± 0.08                                      | 2.2 ± 0.01                                      |
| hsa-miR-639                   | 1.8 ± 0.01                                      | 3.04 ± 0.09                                     |
| hsa-miR-548e-5p               | 1.7 ± 0.00                                      | 2.85 ± 0.11                                     |
| hsa-miR-196a-5p               | 1.71 ± 0.09                                     | 2.86 ± 0.07                                     |
| hsa-miR-513b-5p               | 1.69 ± 0.09                                     | 2.8 ± 0.00                                      |
| hsa-miR-130a-3p               | 1.65 ± 0.07                                     | 2.75 ± 0.11                                     |
| hsa-miR-148b-3p               | 1.66 ± 0.10                                     | 2.7 ± 0.01                                      |
| hsa-miR-3202                  | 1.65 ± 0.00                                     | 2.6 ± 0.04                                      |
| hsa-miR-764                   | 1.66 ± 0.11                                     | 2.61 ± 0.04                                     |
| hsa-miR-4707-3p               | 1.64 ± 0.05                                     | 2.59 ± 0.02                                     |
| hsa-miR-499a-5p               | 1.5 ± 0.05                                      | 2.35 ± 0.04                                     |
| hsa-miR-575                   | 1.6 ± 0.05                                      | 2.47 ± 0.11                                     |
| hsa-miR-1185-1-3p             | 1.5 ± 0.08                                      | 2.3 ± 0.08                                      |
| hsa-miR-548i                  | 1.8 ± 0.01                                      | 2.75 ± 0.11                                     |
| hsa-miR-574-5p                | 1.9 ± 0.00                                      | 2.88 ± 0.09                                     |
| hsa-miR-649                   | 1.5 ± 0.00                                      | 2.25 ± 0.09                                     |
| hsa-miR-585-3p                | 2.5 ± 0.01                                      | 1 ± 0.00                                        |
| hsa-miR-1286                  | 5.1 ± 0.04                                      | 2 ± 0.00                                        |
| hsa-miR-1296-5p               | 2.54 ± 0.05                                     | 1 ± 0.01                                        |
| hsa-miR-148a-3p               | 2.55 ± 0.03                                     | 1 ± 0.01                                        |
| hsa-miR-150-5p                | 2.54 ± 0.04                                     | 1 ± 0.04                                        |
| hsa-miR-181a-3p               | 2.54 ± 0.04                                     | 1 ± 0.03                                        |
| hsa-miR-3168                  | 2.54 ± 0.00                                     | 1 ± 0.01                                        |
| hsa-miR-369-3p                | 2.54 ± 0.10                                     | 1 ± 0.04                                        |
| hsa-miR-660-3p                | 2.54 ± 0.11                                     | 1 ± 0.08                                        |
| hsa-miR-802                   | 2.54 ± 0.10                                     | 1 ± 0.11                                        |
| hsa-miR-376a-2-5p             | 2.68 ± 0.11                                     | 1.05 ± 0.13                                     |
| hsa-miR-551a                  | 2.66 ± 0.12                                     | 1.04 ± 0.09                                     |
| hsa-miR-1976                  | 2.68 ± 0.08                                     | 1.04 ± 0.11                                     |
| hsa-miR-548a-3p               | 2.67 ± 0.11                                     | 1.04 ± 0.13                                     |
| hsa-miR-1287-5p               | 2.5 ± 0.01                                      | 0.98 ± 0.10                                     |
| hsa-miR-320b                  | 2.5 ± 0.01                                      | 0.98 ± 0.11                                     |
| hsa-miR-33b-5p                | 2.5 ± 0.11                                      | 0.98 ± 0.01                                     |
| hsa-miR-873-5p                | 2.5 ± 0.11                                      | 0.98 ± 0.01                                     |
| hsa-miR-510-3p                | 5.31 ± 0.10                                     | 2 ± 0.00                                        |
| hsa-miR-20a-5p+hsa-miR-20b-5p | 5.4 ± 0.06                                      | 2.02 ± 0.02                                     |
| hsa-miR-345-3p                | 2.5 ± 0.05                                      | 0.92 ± 0.03                                     |
| hsa-miR-5010-3p               | 2.5 ± 0.01                                      | 0.92 ± 0.12                                     |
| hsa-miR-548l                  | 2.5 ± 0.02                                      | 0.92 ± 0.02                                     |
| hsa-miR-1827                  | 2.4 ± 0.05                                      | 0.88 ± 0.11                                     |
| hsa-miR-1185-5p               | 2.5 ± 0.01                                      | 0.9 ± 0.12                                      |

|                  |            |            |
|------------------|------------|------------|
| hsa-miR-1245b-3p | 2.5 ±0.11  | 0.9 ±0.06  |
| hsa-miR-382-3p   | 2.5 ±0.07  | 0.9 ±0.09  |
| hsa-miR-563      | 2.3 ±0.12  | 0.9 ±0.01  |
| hsa-miR-589-5p   | 4.24 ±0.15 | 1.5 ±0.01  |
| hsa-miR-629-5p   | 4.24 ±0.09 | 1.5 ±0.08  |
| hsa-miR-26b-5p   | 4 ±0.01    | 1.4 ±0.09  |
| hsa-miR-3150b-3p | 3.73 ±0.10 | 1.3 ±0.12  |
| hsa-miR-323a-3p  | 3.73 ±0.11 | 1.3 ±0.09  |
| hsa-miR-548j-3p  | 3.73 ±0.01 | 1.3 ±0.10  |
| hsa-miR-21-5p    | 4 ±0.06    | 1.36 ±0.10 |
| hsa-miR-412-3p   | 4 ±0.07    | 1.34 ±0.11 |

---
